# Supplementary material for: Clinical code usage in UK general practice: a cohort study exploring 18 conditions over 14 years
Source: HighWire-hosted journal article supplement (doi:10.1136/bmjopen-2021-051456), 2022-07-01
Supplement: bmjopen-2021-051456supp001_data_supplement.pdf [file bmjopen-2021-051456supp001_data_supplement.pdf]

Supplementary data to "Clinical code usage in UK general practice: a cohort study exploring 18 conditions over 14 years", Zghebi et al. 2021.

## Supplementary data

Supplementary data to "Clinical code usage in UK general practice: a cohort study exploring 18 conditions over 14 years", Zghebi et al. 2021.

**Table S1 Diabetes Read code list**

|     | Code    | Coding system | Description                                                  |
|-----|---------|---------------|--------------------------------------------------------------|
| 1.  | 66A3.00 | Read          | Diabetic on diet only                                        |
| 2.  | 66A4.00 | Read          | Diabetic on oral treatment                                   |
| 3.  | 66A5.00 | Read          | Diabetic on insulin                                          |
| 4.  | 66AI.00 | Read          | Diabetic - good control                                      |
| 5.  | 66AJ.00 | Read          | Diabetic - poor control                                      |
| 6.  | 66AJ100 | Read          | Brittle diabetes                                             |
| 7.  | 66AJ.11 | Read          | Unstable diabetes                                            |
| 8.  | 66AJz00 | Read          | Diabetic - poor control NOS                                  |
| 9.  | 66AK.00 | Read          | Diabetic - cooperative patient                               |
| 10. | 66AL.00 | Read          | Diabetic-uncooperative patient                               |
| 11. | 66AV.00 | Read          | Diabetic on insulin and oral treatment                       |
| 12. | C10..00 | Read          | Diabetes mellitus                                            |
| 13. | C100.00 | Read          | Diabetes mellitus with no mention of complication            |
| 14. | C100000 | Read          | Diabetes mellitus; juvenile type; no mention of complication |
| 15. | C100011 | Read          | Insulin dependent diabetes mellitus                          |
| 16. | C100100 | Read          | Diabetes mellitus; adult onset; no mention of complication   |
| 17. | C100111 | Read          | Maturity onset diabetes                                      |
| 18. | C100112 | Read          | Non-insulin dependent diabetes mellitus                      |
| 19. | C100z00 | Read          | Diabetes mellitus NOS with no mention of complication        |
| 20. | C101.00 | Read          | Diabetes mellitus with ketoacidosis                          |
| 21. | C101000 | Read          | Diabetes mellitus; juvenile type; with ketoacidosis          |
| 22. | C101100 | Read          | Diabetes mellitus; adult onset; with ketoacidosis            |
| 23. | C101y00 | Read          | Other specified diabetes mellitus with ketoacidosis          |
| 24. | C101z00 | Read          | Diabetes mellitus NOS with ketoacidosis                      |
| 25. | C102.00 | Read          | Diabetes mellitus with hyperosmolar coma                     |
| 26. | C102000 | Read          | Diabetes mellitus; juvenile type; with hyperosmolar coma     |
| 27. | C102100 | Read          | Diabetes mellitus; adult onset; with hyperosmolar coma       |
| 28. | C102z00 | Read          | Diabetes mellitus NOS with hyperosmolar coma                 |
| 29. | C103.00 | Read          | Diabetes mellitus with ketoacidotic coma                     |
| 30. | C103000 | Read          | Diabetes mellitus; juvenile type; with ketoacidotic coma     |
| 31. | C103100 | Read          | Diabetes mellitus; adult onset; with ketoacidotic coma       |
| 32. | C103y00 | Read          | Other specified diabetes mellitus with coma                  |
| 33. | C103z00 | Read          | Diabetes mellitus NOS with ketoacidotic coma                 |
| 34. | C104.00 | Read          | Diabetes mellitus with renal manifestation                   |
| 35. | C104000 | Read          | Diabetes mellitus; juvenile type; with renal manifestation   |
| 36. | C104100 | Read          | Diabetes mellitus; adult onset; with renal manifestation     |
| 37. | C104y00 | Read          | Other specified diabetes mellitus with renal complications   |
| 38. | C104z00 | Read          | Diabetes mellitus with nephropathy NOS                       |
| 39. | C105.00 | Read          | Diabetes mellitus with ophthalmic manifestation              |
| 40. | C105000 | Read          | Diabetes mellitus; juvenile type; + ophthalmic manifestation |
| 41. | C105100 | Read          | Diabetes mellitus; adult onset; + ophthalmic manifestation   |
| 42. | C105y00 | Read          | Other specified diabetes mellitus with ophthalmic complicatn |
| 43. | C105z00 | Read          | Diabetes mellitus NOS with ophthalmic manifestation          |
| 44. | C106.00 | Read          | Diabetes mellitus with neurological manifestation            |
| 45. | C106000 | Read          | Diabetes mellitus; juvenile; + neurological manifestation    |
| 46. | C106100 | Read          | Diabetes mellitus; adult onset; + neurological manifestation |
| 47. | C106.12 | Read          | Diabetes mellitus with neuropathy                            |

Supplementary data to "Clinical code usage in UK general practice: a cohort study exploring 18 conditions over 14 years", Zghebi et al. 2021.

|     |         |      |                                                              |
|-----|---------|------|--------------------------------------------------------------|
| 48. | C106.13 | Read | Diabetes mellitus with polyneuropathy                        |
| 49. | C106y00 | Read | Other specified diabetes mellitus with neurological comps    |
| 50. | C106z00 | Read | Diabetes mellitus NOS with neurological manifestation        |
| 51. | C107.00 | Read | Diabetes mellitus with peripheral circulatory disorder       |
| 52. | C107000 | Read | Diabetes mellitus; juvenile +peripheral circulatory disorder |
| 53. | C107100 | Read | Diabetes mellitus; adult; + peripheral circulatory disorder  |
| 54. | C107.11 | Read | Diabetes mellitus with gangrene                              |
| 55. | C107.12 | Read | Diabetes with gangrene                                       |
| 56. | C107200 | Read | Diabetes mellitus; adult with gangrene                       |
| 57. | C107300 | Read | IDDM with peripheral circulatory disorder                    |
| 58. | C107400 | Read | NIDDM with peripheral circulatory disorder                   |
| 59. | C107z00 | Read | Diabetes mellitus NOS with peripheral circulatory disorder   |
| 60. | C108.00 | Read | Insulin dependent diabetes mellitus                          |
| 61. | C108000 | Read | Insulin-dependent diabetes mellitus with renal complications |
| 62. | C108011 | Read | Type I diabetes mellitus with renal complications            |
| 63. | C108012 | Read | Type 1 diabetes mellitus with renal complications            |
| 64. | C108100 | Read | Insulin-dependent diabetes mellitus with ophthalmic comps    |
| 65. | C108.11 | Read | IDDM-Insulin dependent diabetes mellitus                     |
| 66. | C108.12 | Read | Type 1 diabetes mellitus                                     |
| 67. | C108.13 | Read | Type I diabetes mellitus                                     |
| 68. | C108200 | Read | Insulin-dependent diabetes mellitus with neurological comps  |
| 69. | C108211 | Read | Type I diabetes mellitus with neurological complications     |
| 70. | C108212 | Read | Type 1 diabetes mellitus with neurological complications     |
| 71. | C108300 | Read | Insulin dependent diabetes mellitus with multiple complicatn |
| 72. | C108400 | Read | Unstable insulin dependent diabetes mellitus                 |
| 73. | C108411 | Read | Unstable type I diabetes mellitus                            |
| 74. | C108500 | Read | Insulin dependent diabetes mellitus with ulcer               |
| 75. | C108511 | Read | Type I diabetes mellitus with ulcer                          |
| 76. | C108600 | Read | Insulin dependent diabetes mellitus with gangrene            |
| 77. | C108700 | Read | Insulin dependent diabetes mellitus with retinopathy         |
| 78. | C108711 | Read | Type I diabetes mellitus with retinopathy                    |
| 79. | C108712 | Read | Type 1 diabetes mellitus with retinopathy                    |
| 80. | C108800 | Read | Insulin dependent diabetes mellitus - poor control           |
| 81. | C108811 | Read | Type I diabetes mellitus - poor control                      |
| 82. | C108812 | Read | Type 1 diabetes mellitus - poor control                      |
| 83. | C108900 | Read | Insulin dependent diabetes maturity onset                    |
| 84. | C108911 | Read | Type I diabetes mellitus maturity onset                      |
| 85. | C108A00 | Read | Insulin-dependent diabetes without complication              |
| 86. | C108B00 | Read | Insulin dependent diabetes mellitus with mononeuropathy      |
| 87. | C108B11 | Read | Type I diabetes mellitus with mononeuropathy                 |
| 88. | C108C00 | Read | Insulin dependent diabetes mellitus with polyneuropathy      |
| 89. | C108D00 | Read | Insulin dependent diabetes mellitus with nephropathy         |
| 90. | C108D11 | Read | Type I diabetes mellitus with nephropathy                    |
| 91. | C108E00 | Read | Insulin dependent diabetes mellitus with hypoglycaemic coma  |
| 92. | C108E11 | Read | Type I diabetes mellitus with hypoglycaemic coma             |
| 93. | C108E12 | Read | Type 1 diabetes mellitus with hypoglycaemic coma             |
| 94. | C108F00 | Read | Insulin dependent diabetes mellitus with diabetic cataract   |
| 95. | C108F11 | Read | Type I diabetes mellitus with diabetic cataract              |
| 96. | C108G00 | Read | Insulin dependent diab mell with peripheral angiopathy       |
| 97. | C108H00 | Read | Insulin dependent diabetes mellitus with arthropathy         |

Supplementary data to "Clinical code usage in UK general practice: a cohort study exploring 18 conditions over 14 years", Zghebi et al. 2021.

|      |         |      |                                                              |
|------|---------|------|--------------------------------------------------------------|
| 98.  | C108H11 | Read | Type I diabetes mellitus with arthropathy                    |
| 99.  | C108J00 | Read | Insulin dependent diab mell with neuropathic arthropathy     |
| 100. | C108J12 | Read | Type 1 diabetes mellitus with neuropathic arthropathy        |
| 101. | C108y00 | Read | Other specified diabetes mellitus with multiple comps        |
| 102. | C108z00 | Read | Unspecified diabetes mellitus with multiple complications    |
| 103. | C109.00 | Read | Non-insulin-dependent diabetes mellitus                      |
| 104. | C109000 | Read | Non-insulin-dependent diabetes mellitus with renal comps     |
| 105. | C109011 | Read | Type II diabetes mellitus with renal complications           |
| 106. | C109012 | Read | Type 2 diabetes mellitus with renal complications            |
| 107. | C109100 | Read | Non-insulin-dependent diabetes mellitus with ophthalm comps  |
| 108. | C109.11 | Read | NIDDM - Non-insulin dependent diabetes mellitus              |
| 109. | C109111 | Read | Type II diabetes mellitus with ophthalmic complications      |
| 110. | C109112 | Read | Type 2 diabetes mellitus with ophthalmic complications       |
| 111. | C109.12 | Read | Type 2 diabetes mellitus                                     |
| 112. | C109.13 | Read | Type II diabetes mellitus                                    |
| 113. | C109200 | Read | Non-insulin-dependent diabetes mellitus with neuro comps     |
| 114. | C109211 | Read | Type II diabetes mellitus with neurological complications    |
| 115. | C109212 | Read | Type 2 diabetes mellitus with neurological complications     |
| 116. | C109300 | Read | Non-insulin-dependent diabetes mellitus with multiple comps  |
| 117. | C109400 | Read | Non-insulin dependent diabetes mellitus with ulcer           |
| 118. | C109411 | Read | Type II diabetes mellitus with ulcer                         |
| 119. | C109412 | Read | Type 2 diabetes mellitus with ulcer                          |
| 120. | C109500 | Read | Non-insulin dependent diabetes mellitus with gangrene        |
| 121. | C109511 | Read | Type II diabetes mellitus with gangrene                      |
| 122. | C109600 | Read | Non-insulin-dependent diabetes mellitus with retinopathy     |
| 123. | C109611 | Read | Type II diabetes mellitus with retinopathy                   |
| 124. | C109612 | Read | Type 2 diabetes mellitus with retinopathy                    |
| 125. | C109700 | Read | Non-insulin dependant diabetes mellitus - poor control       |
| 126. | C109711 | Read | Type II diabetes mellitus - poor control                     |
| 127. | C109712 | Read | Type 2 diabetes mellitus - poor control                      |
| 128. | C109900 | Read | Non-insulin-dependent diabetes mellitus without complication |
| 129. | C109A00 | Read | Non-insulin dependent diabetes mellitus with mononeuropathy  |
| 130. | C109A11 | Read | Type II diabetes mellitus with mononeuropathy                |
| 131. | C109B00 | Read | Non-insulin dependent diabetes mellitus with polyneuropathy  |
| 132. | C109B11 | Read | Type II diabetes mellitus with polyneuropathy                |
| 133. | C109C00 | Read | Non-insulin dependent diabetes mellitus with nephropathy     |
| 134. | C109C11 | Read | Type II diabetes mellitus with nephropathy                   |
| 135. | C109C12 | Read | Type 2 diabetes mellitus with nephropathy                    |
| 136. | C109D00 | Read | Non-insulin dependent diabetes mellitus with hypoglyca coma  |
| 137. | C109D11 | Read | Type II diabetes mellitus with hypoglycaemic coma            |
| 138. | C109D12 | Read | Type 2 diabetes mellitus with hypoglycaemic coma             |
| 139. | C109E00 | Read | Non-insulin depend diabetes mellitus with diabetic cataract  |
| 140. | C109E11 | Read | Type II diabetes mellitus with diabetic cataract             |
| 141. | C109E12 | Read | Type 2 diabetes mellitus with diabetic cataract              |
| 142. | C109F00 | Read | Non-insulin-dependent d m with peripheral angiopath          |
| 143. | C109F11 | Read | Type II diabetes mellitus with peripheral angiopathy         |
| 144. | C109F12 | Read | Type 2 diabetes mellitus with peripheral angiopathy          |
| 145. | C109G00 | Read | Non-insulin dependent diabetes mellitus with arthropathy     |
| 146. | C109G11 | Read | Type II diabetes mellitus with arthropathy                   |
| 147. | C109G12 | Read | Type 2 diabetes mellitus with arthropathy                    |

Supplementary data to "Clinical code usage in UK general practice: a cohort study exploring 18 conditions over 14 years", Zghebi et al. 2021.

|      |         |      |                                                             |
|------|---------|------|-------------------------------------------------------------|
| 148. | C109H00 | Read | Non-insulin dependent d m with neuropathic arthropathy      |
| 149. | C109H11 | Read | Type II diabetes mellitus with neuropathic arthropathy      |
| 150. | C109H12 | Read | Type 2 diabetes mellitus with neuropathic arthropathy       |
| 151. | C109J00 | Read | Insulin treated Type 2 diabetes mellitus                    |
| 152. | C109J11 | Read | Insulin treated non-insulin dependent diabetes mellitus     |
| 153. | C109J12 | Read | Insulin treated Type II diabetes mellitus                   |
| 154. | C109K00 | Read | Hyperosmolar non-ketotic state in type 2 diabetes mellitus  |
| 155. | C10C.00 | Read | Diabetes mellitus autosomal dominant                        |
| 156. | C10C.11 | Read | Maturity onset diabetes in youth                            |
| 157. | C10D.00 | Read | Diabetes mellitus autosomal dominant type 2                 |
| 158. | C10D.11 | Read | Maturity onset diabetes in youth type 2                     |
| 159. | C10E.00 | Read | Type 1 diabetes mellitus                                    |
| 160. | C10E000 | Read | Type 1 diabetes mellitus with renal complications           |
| 161. | C10E100 | Read | Type 1 diabetes mellitus with ophthalmic complications      |
| 162. | C10E.11 | Read | Type I diabetes mellitus                                    |
| 163. | C10E.12 | Read | Insulin dependent diabetes mellitus                         |
| 164. | C10E200 | Read | Type 1 diabetes mellitus with neurological complications    |
| 165. | C10E300 | Read | Type 1 diabetes mellitus with multiple complications        |
| 166. | C10E312 | Read | Insulin dependent diabetes mellitus with multiple complicat |
| 167. | C10E400 | Read | Unstable type 1 diabetes mellitus                           |
| 168. | C10E411 | Read | Unstable type I diabetes mellitus                           |
| 169. | C10E412 | Read | Unstable insulin dependent diabetes mellitus                |
| 170. | C10E500 | Read | Type 1 diabetes mellitus with ulcer                         |
| 171. | C10E600 | Read | Type 1 diabetes mellitus with gangrene                      |
| 172. | C10E700 | Read | Type 1 diabetes mellitus with retinopathy                   |
| 173. | C10E800 | Read | Type 1 diabetes mellitus - poor control                     |
| 174. | C10E812 | Read | Insulin dependent diabetes mellitus - poor control          |
| 175. | C10E900 | Read | Type 1 diabetes mellitus maturity onset                     |
| 176. | C10EA00 | Read | Type 1 diabetes mellitus without complication               |
| 177. | C10EA11 | Read | Type I diabetes mellitus without complication               |
| 178. | C10EB00 | Read | Type 1 diabetes mellitus with mononeuropathy                |
| 179. | C10EC00 | Read | Type 1 diabetes mellitus with polyneuropathy                |
| 180. | C10ED00 | Read | Type 1 diabetes mellitus with nephropathy                   |
| 181. | C10EE00 | Read | Type 1 diabetes mellitus with hypoglycaemic coma            |
| 182. | C10EF00 | Read | Type 1 diabetes mellitus with diabetic cataract             |
| 183. | C10EG00 | Read | Type 1 diabetes mellitus with peripheral angiopathy         |
| 184. | C10EH00 | Read | Type 1 diabetes mellitus with arthropathy                   |
| 185. | C10EJ00 | Read | Type 1 diabetes mellitus with neuropathic arthropathy       |
| 186. | C10EK00 | Read | Type 1 diabetes mellitus with persistent proteinuria        |
| 187. | C10EL00 | Read | Type 1 diabetes mellitus with persistent microalbuminuria   |
| 188. | C10EM00 | Read | Type 1 diabetes mellitus with ketoacidosis                  |
| 189. | C10EM11 | Read | Type I diabetes mellitus with ketoacidosis                  |
| 190. | C10EN00 | Read | Type 1 diabetes mellitus with ketoacidotic coma             |
| 191. | C10EN11 | Read | Type I diabetes mellitus with ketoacidotic coma             |
| 192. | C10EP00 | Read | Type 1 diabetes mellitus with exudative maculopathy         |
| 193. | C10EQ00 | Read | Type 1 diabetes mellitus with gastroparesis                 |
| 194. | C10F.00 | Read | Type 2 diabetes mellitus                                    |
| 195. | C10F000 | Read | Type 2 diabetes mellitus with renal complications           |
| 196. | C10F011 | Read | Type II diabetes mellitus with renal complications          |
| 197. | C10F100 | Read | Type 2 diabetes mellitus with ophthalmic complications      |

Supplementary data to "Clinical code usage in UK general practice: a cohort study exploring 18 conditions over 14 years", Zghebi et al. 2021.

|      |         |      |                                                              |
|------|---------|------|--------------------------------------------------------------|
| 198. | C10F.11 | Read | Type II diabetes mellitus                                    |
| 199. | C10F200 | Read | Type 2 diabetes mellitus with neurological complications     |
| 200. | C10F300 | Read | Type 2 diabetes mellitus with multiple complications         |
| 201. | C10F311 | Read | Type II diabetes mellitus with multiple complications        |
| 202. | C10F400 | Read | Type 2 diabetes mellitus with ulcer                          |
| 203. | C10F500 | Read | Type 2 diabetes mellitus with gangrene                       |
| 204. | C10F511 | Read | Type II diabetes mellitus with gangrene                      |
| 205. | C10F600 | Read | Type 2 diabetes mellitus with retinopathy                    |
| 206. | C10F611 | Read | Type II diabetes mellitus with retinopathy                   |
| 207. | C10F700 | Read | Type 2 diabetes mellitus - poor control                      |
| 208. | C10F711 | Read | Type II diabetes mellitus - poor control                     |
| 209. | C10F900 | Read | Type 2 diabetes mellitus without complication                |
| 210. | C10F911 | Read | Type II diabetes mellitus without complication               |
| 211. | C10FA00 | Read | Type 2 diabetes mellitus with mononeuropathy                 |
| 212. | C10FB00 | Read | Type 2 diabetes mellitus with polyneuropathy                 |
| 213. | C10FB11 | Read | Type II diabetes mellitus with polyneuropathy                |
| 214. | C10FC00 | Read | Type 2 diabetes mellitus with nephropathy                    |
| 215. | C10FC11 | Read | Type II diabetes mellitus with nephropathy                   |
| 216. | C10FD00 | Read | Type 2 diabetes mellitus with hypoglycaemic coma             |
| 217. | C10FE00 | Read | Type 2 diabetes mellitus with diabetic cataract              |
| 218. | C10FF00 | Read | Type 2 diabetes mellitus with peripheral angiopathy          |
| 219. | C10FG00 | Read | Type 2 diabetes mellitus with arthropathy                    |
| 220. | C10FH00 | Read | Type 2 diabetes mellitus with neuropathic arthropathy        |
| 221. | C10FJ00 | Read | Insulin treated Type 2 diabetes mellitus                     |
| 222. | C10FJ11 | Read | Insulin treated Type II diabetes mellitus                    |
| 223. | C10FK00 | Read | Hyperosmolar non-ketotic state in type 2 diabetes mellitus   |
| 224. | C10FL00 | Read | Type 2 diabetes mellitus with persistent proteinuria         |
| 225. | C10FL11 | Read | Type II diabetes mellitus with persistent proteinuria        |
| 226. | C10FM00 | Read | Type 2 diabetes mellitus with persistent microalbuminuria    |
| 227. | C10FN00 | Read | Type 2 diabetes mellitus with ketoacidosis                   |
| 228. | C10FP00 | Read | Type 2 diabetes mellitus with ketoacidotic coma              |
| 229. | C10FQ00 | Read | Type 2 diabetes mellitus with exudative maculopathy          |
| 230. | C10FR00 | Read | Type 2 diabetes mellitus with gastroparesis                  |
| 231. | C10G.00 | Read | Secondary pancreatic diabetes mellitus                       |
| 232. | C10G000 | Read | Secondary pancreatic diabetes mellitus without complication  |
| 233. | C10y.00 | Read | Diabetes mellitus with other specified manifestation         |
| 234. | C10y100 | Read | Diabetes mellitus; adult; + other specified manifestation    |
| 235. | C10yy00 | Read | Other specified diabetes mellitus with other spec comps      |
| 236. | C10yz00 | Read | Diabetes mellitus NOS with other specified manifestation     |
| 237. | C10z.00 | Read | Diabetes mellitus with unspecified complication              |
| 238. | C10z000 | Read | Diabetes mellitus; juvenile type; + unspecified complication |
| 239. | C10z100 | Read | Diabetes mellitus; adult onset; + unspecified complication   |
| 240. | C10zy00 | Read | Other specified diabetes mellitus with unspecified comps     |
| 241. | C10zz00 | Read | Diabetes mellitus NOS with unspecified complication          |
| 242. | Cyu2.00 | Read | [X]Diabetes mellitus                                         |
| 243. | Cyu2000 | Read | [X]Other specified diabetes mellitus                         |
| 244. | Cyu2300 | Read | [X]Unspecified diabetes mellitus with renal complications    |
| 245. | L180500 | Read | Pre-existing diabetes mellitus; insulin-dependent            |
| 246. | L180600 | Read | Pre-existing diabetes mellitus; non-insulin-dependent        |
| 247. | L180X00 | Read | Pre-existing diabetes mellitus; unspecified                  |

Supplementary data to "Clinical code usage in UK general practice: a cohort study exploring 18 conditions over 14 years", Zghebi et al. 2021.

### Table S2 R code

#### 1, 3, 5, year Jackknife correlations (Figures 2, S3, S4)

```
library(dplyr)
library(tidyr)
library(ggplot2)
library(stringr)

setwd("Q:/code_usage")
rm(list=ls())
conditions <- c("asthma", "atrial_fibrillation", "cancer", "chd", "ckd",
               "copd", "dementia", "depression", "dm", "epilepsy", "hf", "ht", "hypothyroidism",
               "learning_disability", "osteoarthritis", "osteoporosis", "smi", "stroke")

jack_incidence <- new.env()
jack_total <- new.env()

for(condition in conditions){
  if(file.exists(myfile <- paste0("data/", condition, "_year_cors.rda"))){
    message("Loading ", myfile)
    load(myfile, envir = jack_incidence)
  }
  if(file.exists(myfile <- paste0("data/", condition, "_total_cors.rda"))){
    message("Loading ", myfile)
    load(myfile, envir = jack_total)
  }
}

incid_data <- bind_rows(lapply(ls(jack_incidence), function(condition){
  bind_rows(jack_incidence[[condition]]) %>%
    mutate(condition = str_replace(condition, "_year_cors", ""),
           type = "incident codes")
}))

total_data <- bind_rows(lapply(ls(jack_total), function(condition){
  bind_rows(jack_total[[condition]]) %>%
    mutate(condition = str_replace(condition, "_total_cors", ""),
           type = "all codes")
}))

jack_data <- bind_rows(incid_data, total_data) %>%
  mutate(year1 = as.numeric(year1))

## Year-on-year correlations:
p <- ggplot(jack_data %>% filter(num < 14),
            aes(x = year1, y = cor, colour = type))
p + geom_point() +
  geom_line() +
```

Supplementary data to "Clinical code usage in UK general practice: a cohort study exploring 18 conditions over 14 years", Zghebi et al. 2021.

```

geom_errorbar(aes(ymin = lower, ymax = upper), width = 0.25) +
facet_wrap( ~ condition) +
theme_bw() +
scale_x_continuous("Year", breaks = c(2000, 2002, 2004, 2006, 2008, 2010, 2012)) +
scale_y_continuous("1st canonical correlation", limits = c(0,1)) +
theme(axis.text.x = element_text(angle = 45, hjust = 1)) +
#labs(title = "")
ggsave("analysis/1-jack_corr_1yearwindow.pdf")

## Bi-yearly correlations:
p <- ggplot(jack_data %>% filter(num >= 14, num < 24),
  aes(x = year1, y = cor, colour = type))
p + geom_point() +
  geom_line() +
  geom_errorbar(aes(ymin = lower, ymax = upper), width = 0.25) +
  facet_wrap( ~ condition) +
  theme_bw() +
  scale_x_continuous("Year", breaks = c(2000, 2002, 2004, 2006, 2008, 2010, 2012)) +
  scale_y_continuous("1st canonical correlation",
    limits = c(0,1)) +
  theme(axis.text.x = element_text(angle = 45, hjust = 1)) +
  #labs(title = "")
ggsave("analysis/2-jack_corr_3yearwindow.pdf")

## 5-yearly correlations:
p <- ggplot(jack_data %>% filter(num >= 14, num < 24),
  aes(x = year1, y = cor, colour = type))
p + geom_point() +
  geom_line() +
  geom_errorbar(aes(ymin = lower, ymax = upper), width = 0.25) +
  facet_wrap( ~ condition) +
  theme_bw() +
  scale_x_continuous("Year", breaks = c(2000, 2002, 2004, 2006, 2008, 2010, 2012)) +
  scale_y_continuous("1st canonical correlation", limits = c(0,1)) +
  #labs(title = "")
ggsave("analysis/3-jack_corr_5yearwindow.pdf")

```

#### **Canonical correlations 5-year windows (for Figure S2)**

```

library(rEHR)
library(dplyr)
library(tidyr)
library(ggplot2)

rm(list=ls())
conditions <- c("asthma", "atrial_fibrillation", "cancer", "chd", "ckd",
  "copd", "dementia", "depression", "dm", "epilepsy", "hf", "ht", "hypothyroidism",
  "learning_disability", "osteoarthritis", "osteoporosis", "smi", "stroke")
correlations <- new.env()

```



Supplementary data to "Clinical code usage in UK general practice: a cohort study exploring 18 conditions over 14 years", Zghebi et al. 2021.

```

for(condition in conditions){
  load(paste0("data/", condition, "_year_cors.rda"), envir = correlations)
  my_corr <- get(paste0(condition, "_year_cors"), envir = correlations)
  my_corr <- lapply(my_corr, function(x) {
    x$condition <- condition
    x
  })
  assign(paste0(condition, "_year_cors"), my_corr, envir = correlations)
}
rm(my_corr)

all_corrs <- bind_rows(lapply(correlations, function(corr){
  data_frame(year = 2005:2013,
    cor = unlist(lapply(corr, function(x) x$cor)),
    condition = corr[[1]]$condition)
}))

p <- ggplot(all_corrs, aes(x = year, y = cor))
p + geom_line() +
  facet_wrap(~ condition) +
  # geom_vline(x = 2004, linetype = "longdash", colour = "red", width = 4) +
  theme_bw() +
  labs(title = "Correlations of clinical code usage (Five year windows)") +
  scale_y_continuous("Spearman's canonical correlation coefficient") +
  scale_x_continuous(breaks = c(2004, 2006, 2008, 2010, 2012)) +
  theme(axis.text.x = element_text(angle = 45, hjust = 1))

ggsave("analysis/canonical_correlations_5yearwindows.pdf")

```

### **Three diversity measures (Figures 3, 4, 5)**

```

library(rEHR)
library(dplyr)
library(tidyr)
library(parallel)
library(ggplot2)
library(bootstrap)

setwd("Q:/code_usage")
#' calculates the Shannon index of diversity/entropy
shannon <- function(x)
{
  x <- drop(as.matrix(x))
  if (length(dim(x)) > 1) {
    total <- apply(x, 1, sum)
    x <- sweep(x, 1, total, "/")
  }
  else {
    x <- x/sum(x)
  }
}

```

Supplementary data to "Clinical code usage in UK general practice: a cohort study exploring 18 conditions over 14 years", Zghebi et al. 2021.

```
x <- -x * log(x)

if (length(dim(x)) > 1)
  H <- apply(x, sum, na.rm = TRUE)
else H <- sum(x, na.rm = TRUE)
H
}

evenness_fn <- function(x){
  H <- shannon(x)
  R <- length(x)
  H / log(R)
}

jack_stats <- function(x, thetihat){
  n <- length(x)
  bias <- (n - 1) * (mean(x) - thetihat)
  se <- sqrt(((n - 1)/n) * sum((x - mean(x))^2))
  list(param = thetihat, bias = bias, se = se)
}

conditions <- c("asthma", "atrial_fibrillation", "blood_pressure", "cancer", "chd", "ckd",
               "copd", "dementia", "depression", "dm", "epilepsy", "hf", "ht", "hypothyroidism",
               "learning_disability", "osteoarthritis", "osteoporosis", "smi", "stroke")
frequencies <- new.env()

for(condition in conditions){
  load(paste0("data/", condition, "_frequencies.rda"), envir = frequencies)
  incid <- get(paste0(condition, "_incidence_freqs"), envir = frequencies)
  incid$type <- "incident codes"
  assign(paste0(condition, "_incidence_freqs"), incid, envir = frequencies)

  total <- get(paste0(condition, "_total_freqs"), envir = frequencies)
  total$type <- "all codes"
  assign(paste0(condition, "_total_freqs"), total, envir = frequencies)
}

all_freqs <- bind_rows(lapply(frequencies, function(x) x))

years <- 2000:2013
jacks <- bind_rows(lapply(frequencies, function(condition){
  bind_rows(mclapply(years, function(this_year){
    dat <- condition %>%
      filter(year == this_year)
    H <- shannon(dat$freq)
    H_jack <- jackknife(dat$freq, theta = shannon)
    richness <- nrow(dat)
    evenness <- evenness_fn(dat$freq)
    evenness_jack <- jackknife(dat$freq, theta = evenness_fn)
    data_frame(year = rep(this_year, 3),
               condition = rep(dat$condition[1], 3),
```

Supplementary data to "Clinical code usage in UK general practice: a cohort study exploring 18 conditions over 14 years", Zghebi et al. 2021.

```

    type = rep(dat$type[1], 3),
    index = c("H", "richness", "evenness"),
    value = c(H, richness, evenness),
    upper = c(H + 1.96 * H_jack$jack.se,
              NA,
              evenness + 1.96 * evenness_jack$jack.se),
    lower = c(H - 1.96 * H_jack$jack.se,
              NA,
              evenness - 1.96 * evenness_jack$jack.se),
    bias = c(H_jack$jack.bias, NA, evenness_jack$jack.bias))

  }, mc.cores = 1))
}))

p <- ggplot(jacks %>% filter(index == "H", condition != "blood_pressure"),
            aes(x = year, y = value, colour = type))
p + geom_line() +
  facet_wrap( ~ condition) +
  geom_errorbar(aes(ymin = lower, ymax = upper), width = 0.25) +
  #geom_vline(x = 2004, linetype = "longdash", colour = "red", width = 4) +
  theme_bw() +
  labs(title = "Entropy of clinical code usage") +
  scale_y_continuous("H, Entropy (diversity) of code useage")
ggsave("analysis/4-entropy.pdf")
ggsave("analysis/4-entropy.png")

p <- ggplot(jacks %>% filter(index == "richness", condition != "blood_pressure"),
            aes(x = year, y = value, colour = type))
p + geom_line() +
  facet_wrap( ~ condition) +
  geom_errorbar(aes(ymin = lower, ymax = upper), width = 0.25) +
  #geom_vline(x = 2004, linetype = "longdash", colour = "red", width = 4) +
  theme_bw() +
  labs(title = "Richness of clinical code usage") +
  scale_y_continuous("Total number of codes used")
ggsave("analysis/5-richness.pdf")
ggsave("analysis/5-richness.png")

p <- ggplot(jacks %>% filter(index == "evenness", condition != "blood_pressure"),
            aes(x = year, y = value, colour = type))
p + geom_line() +
  facet_wrap( ~ condition) +
  geom_errorbar(aes(ymin = lower, ymax = upper), width = 0.25) +
  #geom_vline(x = 2004, linetype = "longdash", colour = "red", width = 4) +
  theme_bw() +
  labs(title = "Evenness of clinical code usage") +
  scale_y_continuous("J, Evenness of code useage")
ggsave("analysis/6-evenness.pdf")
ggsave("analysis/6-evenness.png")

save(jacks, file = "data/jackknife_entropy.rda")

```

Supplementary data to "Clinical code usage in UK general practice: a cohort study exploring 18 conditions over 14 years", Zghebi et al. 2021.

**Figure S1 Canonical correlation using 1-year window of clinical code usage for 18 mental and physical conditions**

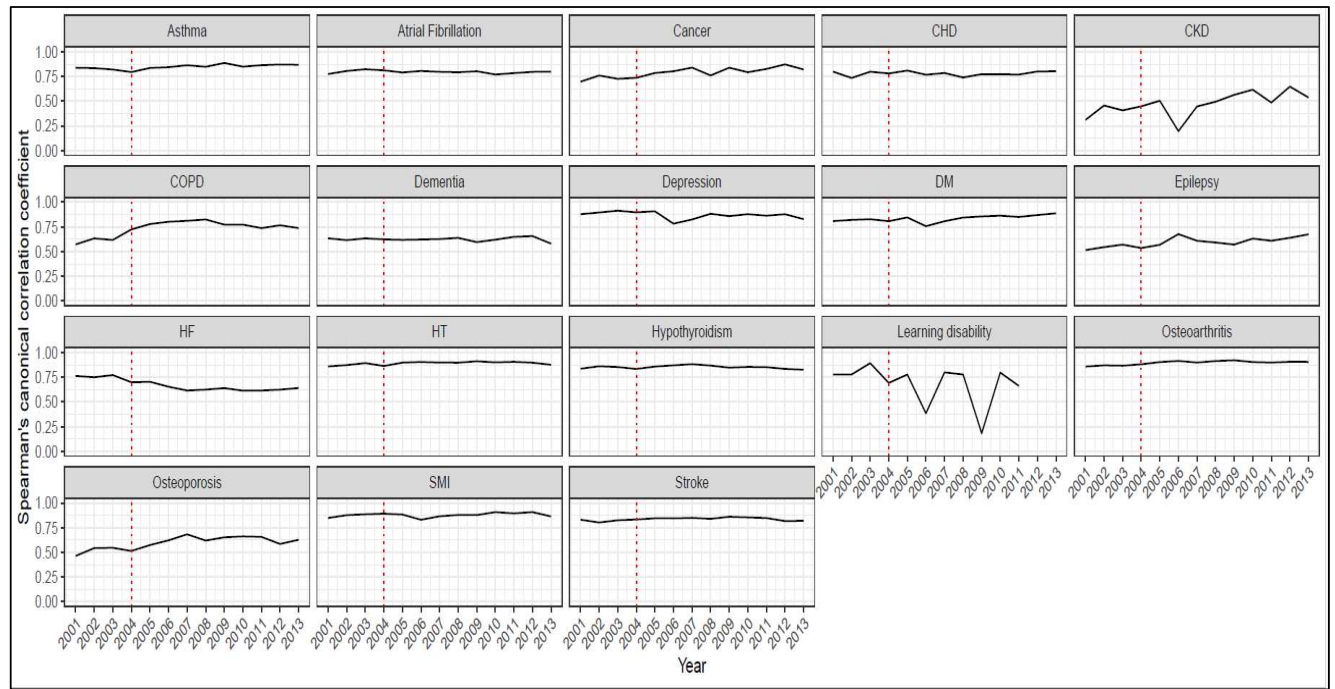

CHD, coronary heart disease; CKD, chronic kidney disease; COPD, chronic obstructive pulmonary disease; DM, diabetes mellitus; HF, heart failure; HT, hypertension; SMI, severe mental illness. The red line represents the launching year of the QOF in 2004.

Supplementary data to "Clinical code usage in UK general practice: a cohort study exploring 18 conditions over 14 years", Zghebi et al. 2021.

**Figure S2 Canonical correlation using 5-year window of clinical code usage for 18 mental and physical conditions**

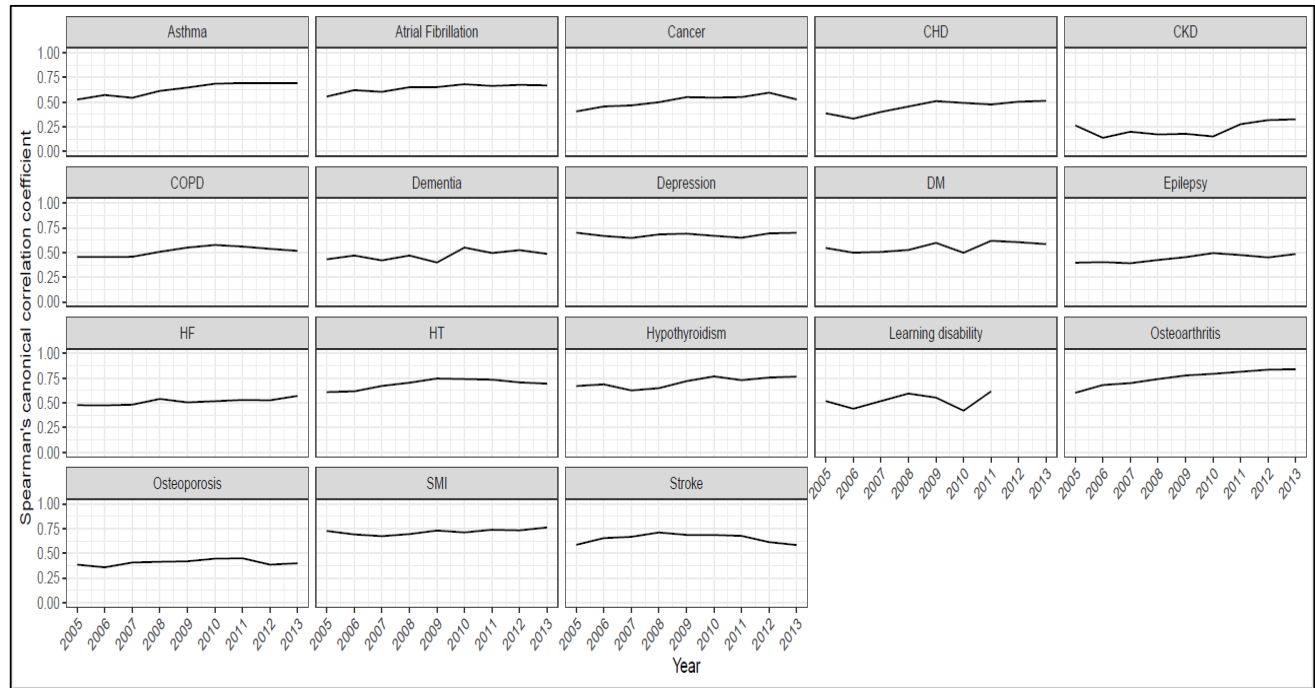

CHD, coronary heart disease; CKD, chronic kidney disease; COPD, chronic obstructive pulmonary disease; DM, diabetes mellitus; HF, heart failure; HT, hypertension; SMI, severe mental illness. The red line represents the launching year of the QOF in 2004.

Supplementary data to "Clinical code usage in UK general practice: a cohort study exploring 18 conditions over 14 years", Zghebi et al. 2021.

**Figure S3 Bias-corrected canonical correlations (95%CI) using 1-year window for incident clinical code usage for 18 mental and physical conditions**

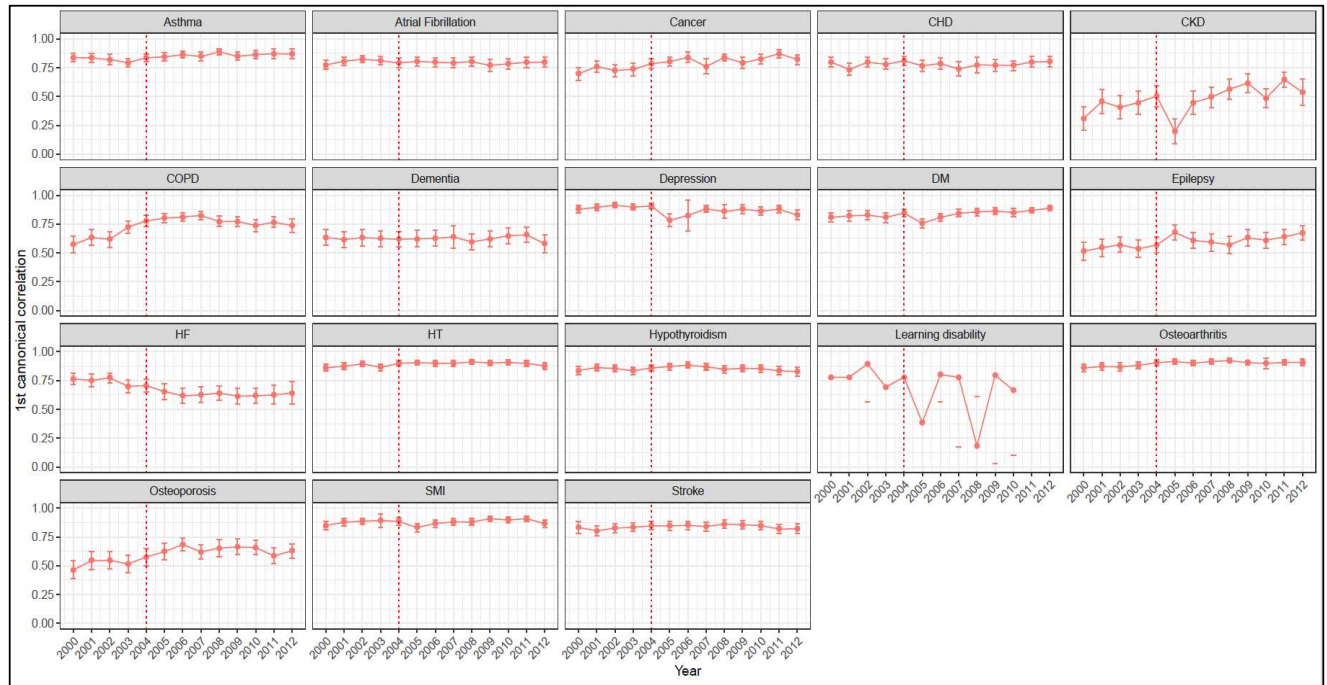

CHD, coronary heart disease; CKD, chronic kidney disease; COPD, chronic obstructive pulmonary disease; DM, diabetes mellitus; HF, heart failure; HT, hypertension; SMI, severe mental illness.

Incident code: a clinical code indicating new (incident) cases. The red line represents the launching year of the QOF in 2004.

Supplementary data to "Clinical code usage in UK general practice: a cohort study exploring 18 conditions over 14 years", Zghebi et al. 2021.

**Figure S4 Bias-corrected canonical correlations using 5-year window for incident clinical code usage for 18 mental and physical conditions**

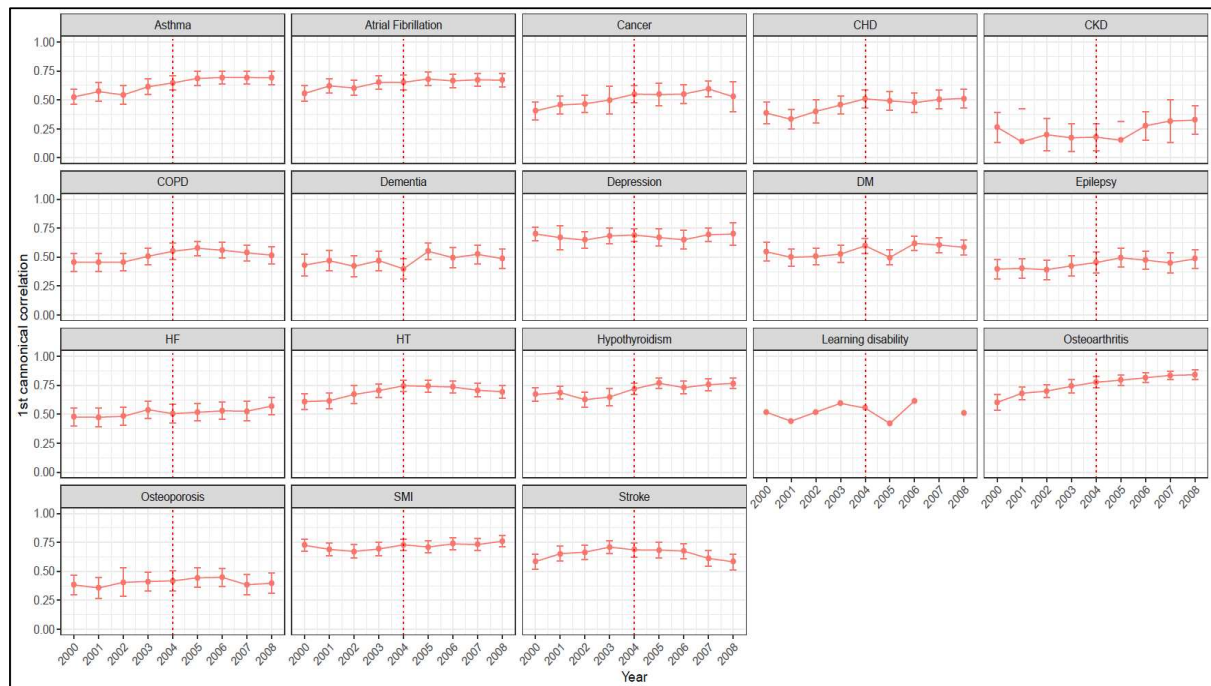

CHD, coronary heart disease; CKD, chronic kidney disease; COPD, chronic obstructive pulmonary disease; DM, diabetes mellitus; HF, heart failure; HT, hypertension; SMI, severe mental illness.

Incident code: a clinical code indicating new (incident) cases. The red line represents the launching year of the QOF in 2004.
